# Supplementary material for: Rational Design of an Ion-Imprinted Polymer for Aqueous Methylmercury Sorption
Source: PubMed Central journal article supplement (PMC7766906; doi:10.3390/nano10122541), 2020-12-17
Supplement: nanomaterials-10-02541-s001.pdf [file nanomaterials-10-02541-s001.pdf]

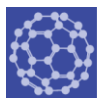

## Supporting Information

# Rational design of an ion imprinted polymer for aqueous methylmercury sorption

**Ruddy L. Mesa**<sup>1</sup>, **Javier E.L. Villa**<sup>2,3</sup>, **Sabir Khan**<sup>1,2,3</sup>, **Rafaella R. Alves Peixoto**<sup>4</sup>, **Marcelo A. Morgano**<sup>5</sup>, **Luís Moreira Gonçalves**<sup>6</sup>, **Maria D.P.T. Sotomayor**<sup>2,3,\*</sup> and **Gino Picasso**<sup>1,\*</sup>

<sup>1</sup> Laboratory of Physical Chemistry Research, Faculty of Sciences, National University of Engineering, Lima 15333, Peru; a20156475@pucp.edu.pe (R.L.M.M.); sabir\_chemist@yahoo.com (S.K.)

<sup>2</sup> Institute of Chemistry, State University of São Paulo (UNESP), Araraquara-SP 14800-060, Brazil; villa.javier03@gmail.com

<sup>3</sup> National Institute for Alternative Technologies of Detection, Toxicological Evaluation and Removal of Micropollutants and Radioactives (INCT-DATREM), Araraquara-SP 14800-060, Brazil

<sup>4</sup> Department of Analytical Chemistry, Fluminense Federal University (UFF), Niterói-RJ 24020-150, Brazil; rafaellapeixoto@id.uff.br

<sup>5</sup> Institute of Food Technology (ITAL), Campinas-SP 13070-178, Brazil; morgano.ital@gmail.com

<sup>6</sup> Institute of Chemistry, University of São Paulo (USP), São Paulo-SP 05508-000, Brazil; lmgoncalves@iq.usp.br

\* Correspondence: m.sotomayor@unesp.br (M.D.P.T.S.); gpicasso@uni.edu.pe (G.P.); Tel.: +55-16-33019620 (M.D.P.T.S.)

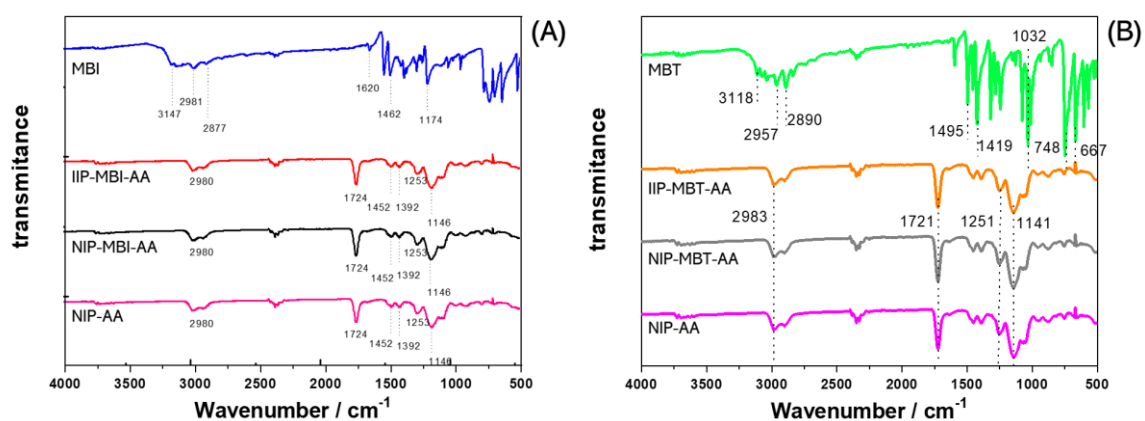

**Figure S1.** FTIR spectra of (A) MBI, IIP-MBI-AA, NIP-MBI-AA, and NIP-AA; and (B) MBT, IIP-MBT-AA, NIP-MBT-AA, and NIP-AA.

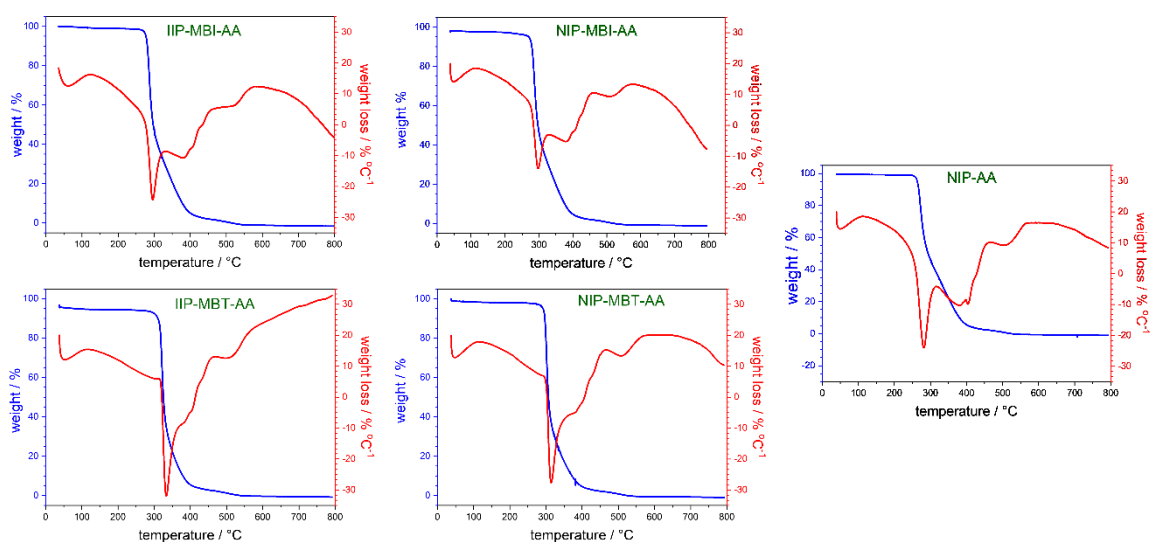

**Figure S2.** Thermal gravimetric (blue) and differential thermal analysis (red) of IIP-MBI-AA, NIP-MBI-AA, IIP-MBT-A, NIP-MBT-AA and NIP-AA.

**Table S1.** Comparative selected bond lengths (Å) for MeHg<sup>+</sup>-MBI and MeHg<sup>+</sup>-MBT.

| material               | bond's lengths | theoretical values | experimental values |
|------------------------|----------------|--------------------|---------------------|
| MeHg <sup>+</sup> -MBI | Hg(20)-C(1)    | 2.232              | -                   |
|                        | Hg(20)-S(2)    | 2.698              | -                   |
|                        | S(2)-C(10)     | 1.739              | -                   |
|                        | C(10)-NH(11)   | 1.375              | -                   |
|                        | C(10)-N(9)     | 1.318              | -                   |
| MeHg <sup>+</sup> -MBT | Hg(11)-C(12)   | 2.223              | 2.062               |
|                        | Hg(11)-S(10)   | 2.717              | 2.369               |
|                        | S(10)-C(8)     | 1.736              | 1.713               |
|                        | C(8)-S(9)      | 1.784              | 1.782               |
|                        | C(8)-N(7)      | 1.297              | 1.323               |

The theoretical calculations were performed by DFT M062X and the experimental analysis for MeHg<sup>+</sup>-MBT was performed by single-crystal X-ray diffraction (Bravo *et al.* 1985).

**Table S2.** Predicted binding energy of MeHg<sup>+</sup>-MBI and MeHg<sup>+</sup>-MBT with FMs.

| pre-polymerization             | $\Delta E$ with FM / kcal mol <sup>-1</sup> | $\Delta E$ with template MeHg <sup>+</sup> / kcal mol <sup>-1</sup> |
|--------------------------------|---------------------------------------------|---------------------------------------------------------------------|
| MeHg <sup>+</sup> -MBI-2(AM)   | -15.4                                       | -14.8                                                               |
| MeHg <sup>+</sup> -MBI-2(AA)   | -20.0                                       | -13.3                                                               |
| MeHg <sup>+</sup> -MBI-2(MAA)  | -18.9                                       | -12.7                                                               |
| MeHg <sup>+</sup> -MBI-1(4vp)  | -5.9                                        | -13.4                                                               |
| MeHg <sup>+</sup> -MBI-1(1vim) | -5.9                                        | -14.2                                                               |
| MeHg <sup>+</sup> -MBI-2(2HM)  | -14.9                                       | -10.4                                                               |
| MeHg <sup>+</sup> -MBT-1(AM)   | -5.4                                        | -9.9                                                                |
| MeHg <sup>+</sup> -MBT-1(AA)   | -12.2                                       | -11.0                                                               |
| MeHg <sup>+</sup> -MBT-(MAA)   | -12.1                                       | -11.2                                                               |
| MeHg <sup>+</sup> -MBT-1(2HM)  | -9.8                                        | -9.3                                                                |

AM: acrylamide, AA: acrylic acid, MAA: methacrylic acid, 4vp: 4-vinylpyridine, 1vim: 1-vinylimidazole, 2HM: 2-hydroxyethyl methacrylate

**Table S3.** Selectivity parameters for the adsorption of Hg<sup>2+</sup>, Zn<sup>2+</sup>, Cd<sup>2+</sup> and Pb<sup>2+</sup> ions with respect to MeHg<sup>+</sup>.

| material   | ion                    | K <sub>d</sub> (MeHg <sup>+</sup> ) | K <sub>d</sub> (ion) | k    | I   |
|------------|------------------------|-------------------------------------|----------------------|------|-----|
| IIP-MBI-AA | <b>Hg<sup>2+</sup></b> | 0.98                                | 1.11                 | 0.89 | 2.5 |
| NIP-MBI-AA |                        | 0.35                                | 1.01                 | 0.35 |     |
| IIP-MBT-AA |                        | 4.38                                | 5.07                 | 0.86 | 1.0 |
| NIP-MBT-AA |                        | 3.48                                | 3.89                 | 0.89 |     |
| IIP-MBI-AA | <b>Cd<sup>2+</sup></b> | 0.74                                | 0.04                 | 19.8 | 3.6 |
| NIP-MBI-AA |                        | 0.47                                | 0.08                 | 5.5  |     |
| IIP-MBT-AA |                        | 10.15                               | 0.04                 | 261  | 1.1 |
| NIP-MBT-AA |                        | 7.5                                 | 0.03                 | 230  |     |
| IIP-MBI-AA | <b>Pb<sup>2+</sup></b> | 0.72                                | 0.12                 | 5.8  | 1.2 |
| NIP-MBI-AA |                        | 0.50                                | 0.10                 | 5.0  |     |
| IIP-MBT-AA |                        | 7.85                                | 0.03                 | 288  | 1.0 |
| NIP-MBT-AA |                        | 6.21                                | 0.02                 | 278  |     |
| IIP-MBI-AA | <b>Zn<sup>2+</sup></b> | 0.76                                | 0.02                 | 35.2 | 2.8 |
| NIP-MBI-AA |                        | 0.42                                | 0.03                 | 12.4 |     |
| IIP-MBT-AA |                        | 19.26                               | 0.01                 | 1510 | 1.3 |
| NIP-MBT-AA |                        | 8.79                                | 0.01                 | 1164 |     |

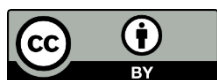

© 2020 by the authors. Submitted for possible open access publication under the terms and conditions of the Creative Commons Attribution (CC BY) license (<http://creativecommons.org/licenses/by/4.0/>).
